# Supplementary material
Source: PubMed Central journal article supplement (PMC5736814)
Supplement: IAI.00517-17_zii001182256s1.pdf [file IAI.00517-17_zii001182256s1.pdf]

## SUPPLEMENTARY INFORMATION

Supplementary table S1- Primers used in this study

| Primer             | Sequence (5'→3')*                                                                       | Amplicon size (bp) | Application            | Reference            |
|--------------------|-----------------------------------------------------------------------------------------|--------------------|------------------------|----------------------|
| icdA-F<br>icdA-R   | TGGTATCGGTGTTGATGTCACTC<br>CATCCTGGCCGTAACCTGTGTG                                       | 140                | qRT-PCR in<br>bacteria | Modified from<br>[1] |
| motB1-F<br>motA3-R | TTTATGACGGCGATGATGGC<br>CGGCGTACGAAAATATTCGGC                                           | 99                 | qRT-PCR in<br>bacteria | This work            |
| cheB-F<br>cheB-R   | AGTTGGGGGCCATCGATTTT<br>CGCACTTTTTTCGGCGATCAT                                           | 91                 | qRT-PCR in<br>bacteria | This work            |
| flgB-F<br>flgB-R   | TACCCGATCAGCCTTCTTTG<br>GTTGGCTACCCAGAACGGTA                                            | 114                | qRT-PCR in<br>bacteria | This work            |
| fliN1-F<br>fliM3-R | TTGAATTCGCTGAATGAGGAAC<br>TCCTGCATAGCACCGCTGACATC                                       | 187                | qRT-PCR in<br>bacteria | This work            |
| flgM-F<br>flgM-R   | CTTGAAACCCGTTAGCACTGTC<br>GATAGCCGTTTTTAATGCTTCGAC                                      | 188                | qRT-PCR in<br>bacteria | This work            |
| fliC-F<br>fliC-R   | AGATCACCTTAGCTGGCAAACC<br>CCCCAGAGAAGAACGAACCTGC                                        | 164                | qRT-PCR in<br>bacteria | This work            |
| fliE4-F<br>fliE4-R | AATCACTCTGGGTGAGCCG<br>CTTGTTGCGCACCTGAATCC                                             | 101                | qRT-PCR in<br>bacteria | This work            |
| fliF1-F<br>fliF1-R | CACGCAATCCAATACCAGCG<br>CGATAGGCGACAGAATGGCT                                            | 110                | qRT-PCR in<br>bacteria | This work            |
| tsr1-F<br>tsr1-R   | GGGTATCCGCTGGATGATGG<br>TTCCTCTGACGTGGATCGC                                             | 148                | qRT-PCR in<br>bacteria | This work            |
| fliA3-F<br>fliA3-R | TATCAATTGGTGAATCACTGTATACCGC<br>(MfeI)<br>TATAAGCTTCTATAACTTACCCAGTTTGGT<br>G (HindIII) | 738                | Cloning in<br>pJF119EH | This work            |

|            |                                                       |                       |                                        |                           |
|------------|-------------------------------------------------------|-----------------------|----------------------------------------|---------------------------|
| flgM3-F    | TAT <u>GAATTC</u> ATGAGCATTGACCGTACCTC<br>(EcoRI)     | 312                   | Cloning in<br>pGEX4T-1.                | This<br>work              |
| flgM3-R    | TAT <u>CTCGAG</u> TTATTTACTCTGTAAGTAGCT<br>CTG (XhoI) |                       |                                        |                           |
| fliE2-F    | GGGAATTCATGGCAGCAATACAGGG<br>(EcoRI)                  | 333                   | Cloning in<br>pBAD22 or<br>pJF119EH.   | This<br>work              |
| fliE2-R    | AGCAAGCTTTTAAACCTGCATAGACATCA<br>CTT (HindIII)        |                       |                                        |                           |
| fliE1-F    | AGGGGATTGAAGGGTTATTAGCCA                              | Variable <sup>a</sup> | fliEΔ42<br>screening and<br>sequencing | This<br>work              |
| fliE1-R    | ACGATCCAGCGCAGCATGTAG                                 |                       |                                        |                           |
| mB-actin-F | GCTTCTTTCAGCTCCTTCGT                                  | 68                    | qRT-PCR in<br>cecum                    | [2]                       |
| mB-actin-R | CGTCATCCATGGCGAACTG                                   |                       |                                        |                           |
| mCXCL1-F   | CTTGTTTCAGAAAATTGTCCAAAA                              | 84                    | qRT-PCR in<br>cecum                    | [2]                       |
| mCXCL1-R   | ACGGTGCCATCAGAGCAGTCT                                 |                       |                                        |                           |
| mIL17a-F   | CTCCAGAAGGCCCTCAGACTAC                                | 69                    | qRT-PCR in<br>cecum                    | [2]                       |
| mIL17a-R   | GGGTCTTCATTGCGGTGG                                    |                       |                                        |                           |
| mIFNγ-F    | TCAGCAACAGCAAGGCGAAA                                  | 143                   | qRT-PCR in<br>cecum                    | [3]                       |
| mIFNγ-R    | CCGCTTCCTGAGGCTGGAT                                   |                       |                                        |                           |
| mTNFα-F    | CATCTTCTCAAATTCGAGTGACAA                              | 63                    | qRT-PCR in<br>cecum                    | [2]                       |
| mTNFα-R    | CCTCCACTTGGTGGTTTGCT                                  |                       |                                        |                           |
| mLcn2-F    | CCATCTATGAGCTACAAGAGAACAAT                            | 89                    | qRT-PCR in<br>cecum                    | Muñoz<br>N. PhD<br>thesis |
| mLcn2-R    | TCTGATCCAGTAGCGACAGC                                  |                       |                                        |                           |
| mS100A9-F  | CACCCTGAGCAAGAAGGAAT                                  | 95                    | qRT-PCR in<br>cecum                    | Muñoz<br>N. PhD<br>thesis |
| mS100A9-R  | TGTCATTTATGAGGGCTTCATTT                               |                       |                                        |                           |

\*: restriction sites are underlined and indicated in parenthesis. Start and stop codons are written in italics. <sup>a</sup>: amplicon variable length depending on presence or absence of *fliEΔ42* deletion, 77bp or 119bp, respectively.

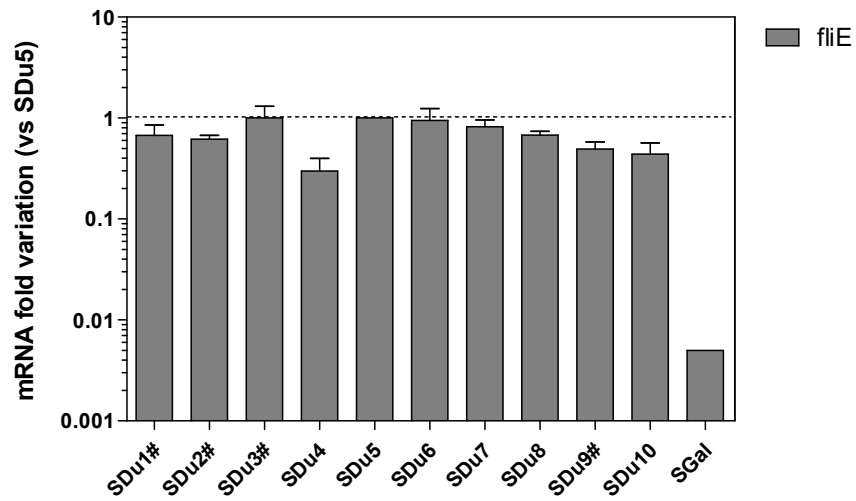

Figure S1- *fliE* mRNA levels quantification in *S. Dublin* isolates grown in LB to mid-log phase by qRT PCR. Results (means and standard errors) from two independent experiments are shown. The dashed line indicates value 1, arbitrarily assigned to isolate SDu5. SGal is a strain of the aflagellateserovar *S. Gallinarum*. # indicates non-motile isolates.

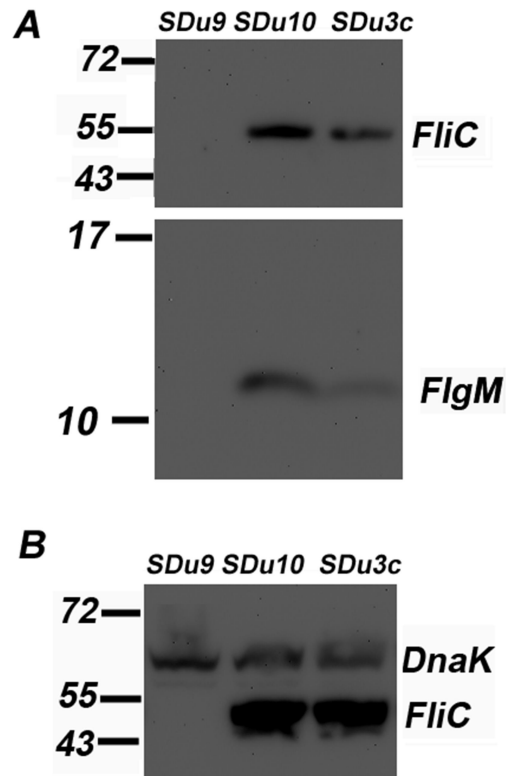

Figure S2- Western blot analysis of secreted (A) or cellular (B) proteins extracts of *S. Dublin* isolates, using anti-FliC and anti-FlgM antisera. SDu9: aflagellate, SDu10: flagellate, SDu3c: SDu3 complemented with *fliE* wild type, grown in presence of inducer. Detection of DnaK (69.1kDa), was used to verify equal loading quantities in cellular fractions (panel B) and the presence of protein in the secreted fraction due to cell lysis (panel A). Sizes of molecular mass markers are indicated in kDa. Sizes of FliC and FlgM are 53kDa and 10.6 kDa, respectively.

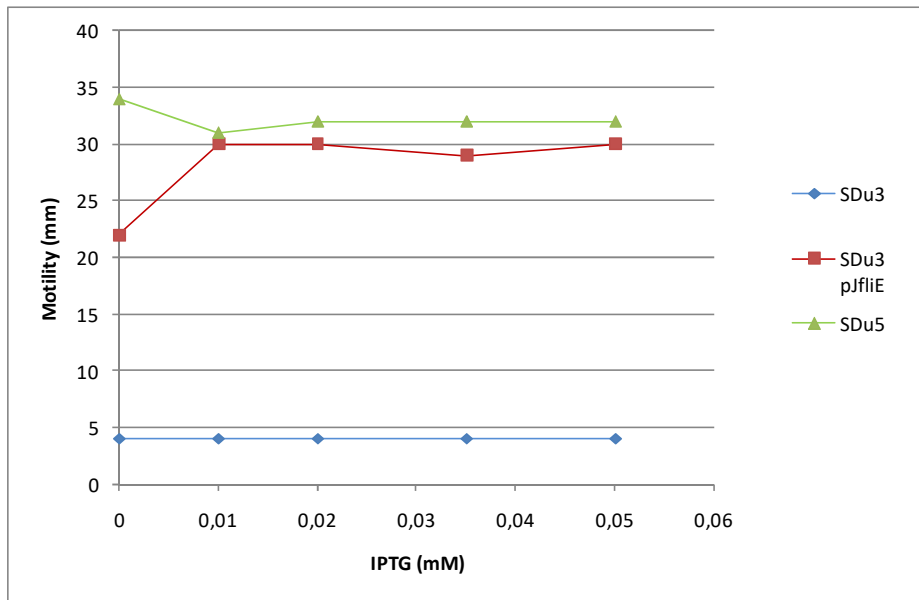

Figure S3- Motility tests of SDu3, SDu5 or SDu3 complemented with pJfliE. Mid-exponential phase cultures grown in LB containing 100ug/ml ampicillin were spotted in LB soft agar containing increasing concentrations of IPTG and incubated at 37°C for 6hs. The diameter of the halo of growth is plotted in the Y axis.

A)

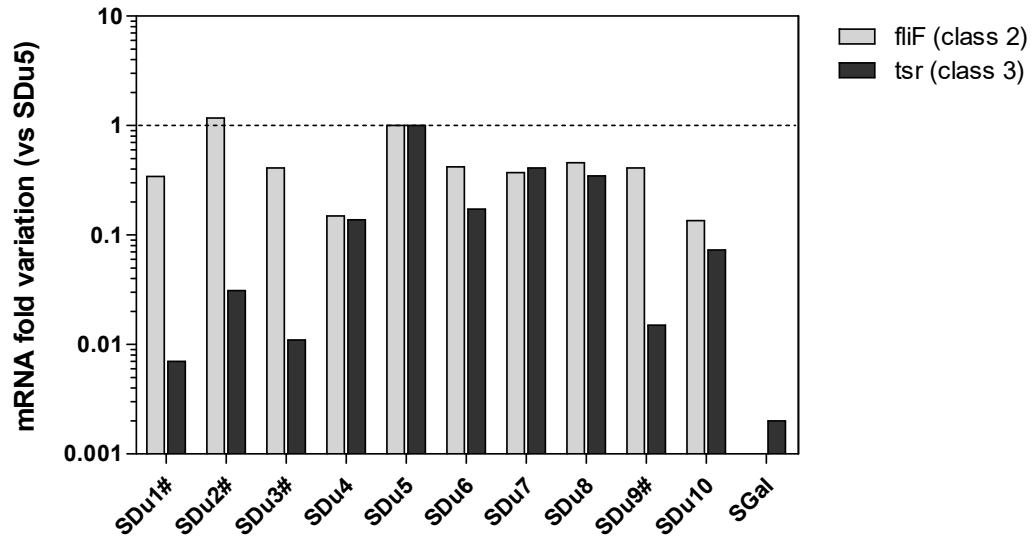

B)

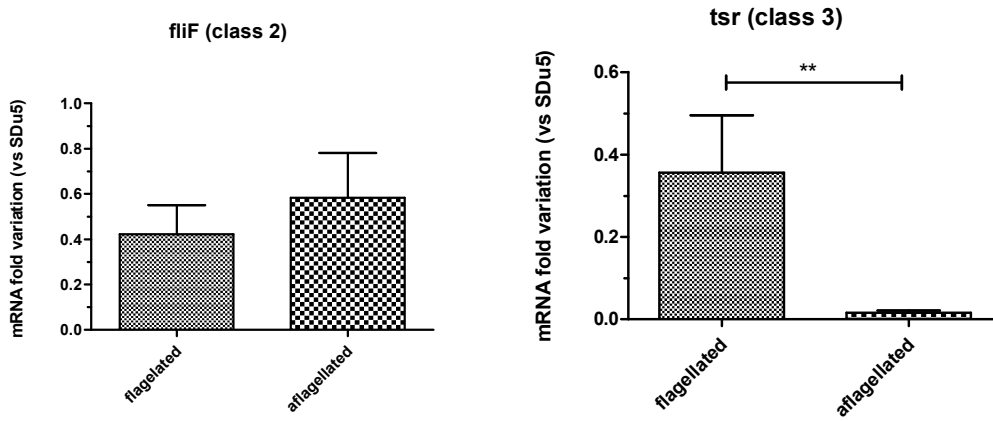

Figure S4- (A) *fliF* and *tsr* mRNA levels quantification in *S. Dublin* isolates grown to mid-log phase by qRT PCR. The dashed line indicates value 1, arbitrarily assigned to isolate SDu5. SGal is a strain of the aflagellate serovar *S. Gallinarum*. # indicates non-motile isolates. (B) mRNA fold variation ratios from panel A were grouped according to phenotype (flagellated vs aflagellated) and Mann Whitney test (GraphPad Prism 4 software) was applied. \*\*:  $p < 0.01$

A)

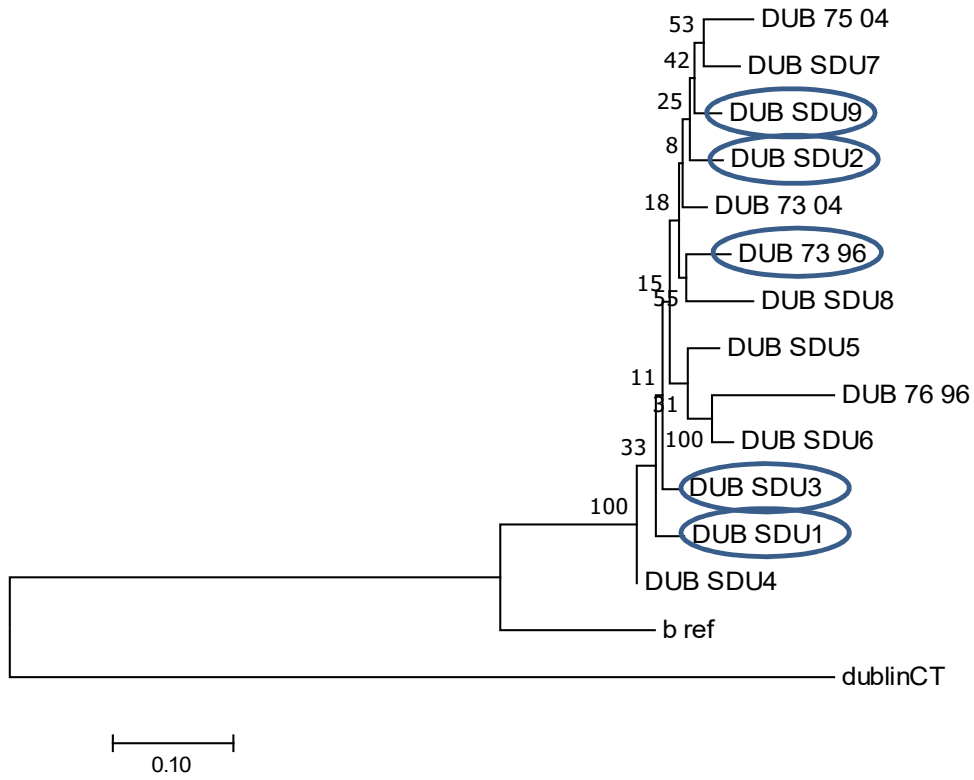

B)

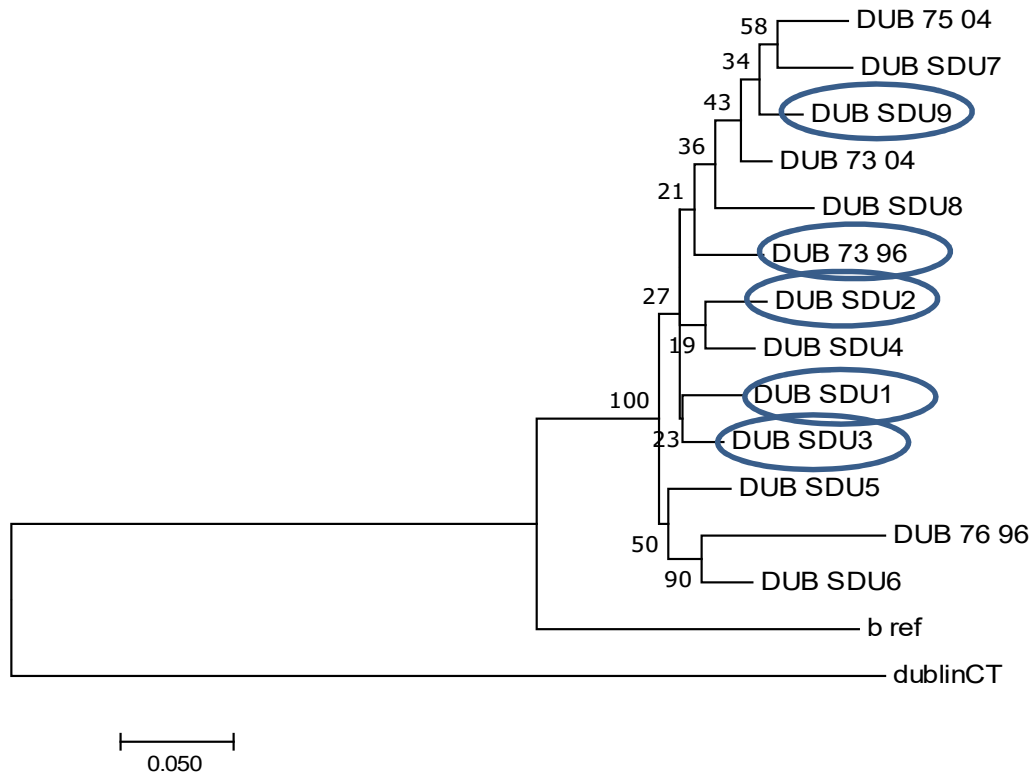

C)

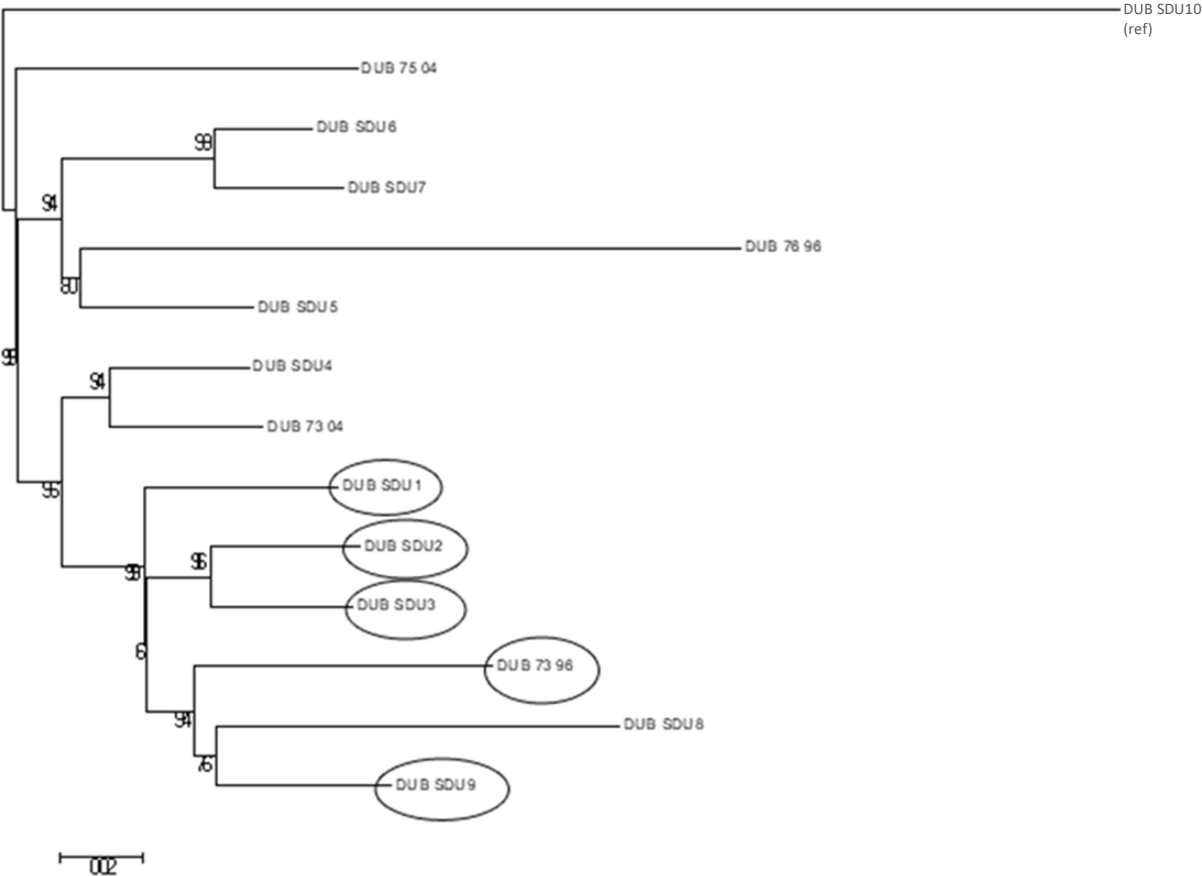

Figure S5- Evolutionary relationships of taxa. Three different methods were applied to obtain phylogenetic trees of sequenced isolates used in this study, based on SNPs of homologous genomic regions. (A) The evolutionary relationship among strains was inferred using the Neighbor-Joining method [4]. Statistical support based on bootstrap test (100 replicates) is shown next to the nodes [5]. The evolutionary distances were computed using the Maximum Composite Likelihood method [6]. The rate variation among sites was modeled with a gamma distribution (shape parameter = 1). There were a total of 1767 positions in the final dataset. Evolutionary analyses were conducted in MEGA7 [7]. *fltEA42*-harboring strains are indicated by an ellipse. Isolate SDu10 (b ref) was used as reference. *S. Dublin* strain CT\_02021853 (NCBI reference sequence: NC\_011205.1) (dublinCT) was added as outgroup. (B) Molecular Phylogenetic analysis by Maximum Likelihood method. The phylogenetic tree was inferred by using the Maximum Likelihood method based on the Hasegawa-Kishino-Yano model [8]. Bootstrap statistical support based on 100 replicates is shown next to nodes. Initial tree(s) for the heuristic search were obtained automatically by applying Neighbor-Join. A discrete Gamma



distribution was used to model evolutionary rate differences among sites (8 categories +G). The analysis involved a total of 1767 positions in the final dataset. Evolutionary analyses were conducted in MEGA7 [7]. *fliE*Δ42-harboring strains are indicated by an ellipse. Isolate SDu10 (b ref) was used as reference. *S. Dublin* strain CT\_02021853 (NCBI reference sequence: NC\_011205.1) (dublinCT) was added as outgroup. (C) Phylogeny of 14 sequenced *S. Dublin* Uruguayan strains, using CSI Phylogeny-1.4 (Center for Genomic Epidemiology, [cge.cbs.dtu.dk/services/CSIPhylogeny/](http://cge.cbs.dtu.dk/services/CSIPhylogeny/)). SDu10 was used as reference. *fliE*Δ42-harboring strains are indicated by an ellipse.

## REFERENCES

1. Cummings, L.A., Wilkerson WD, Bergsbaken T, Cookson BT. 2006. *In vivo, fliC expression by Salmonella enterica serovar Typhimurium is heterogeneous, regulated by ClpX, and anatomically restricted.* Mol Microbiol, **61**(3): p. 795-809.
2. Munoz, N., Van Maele L, Marqués JM, Rial A, Sirard JC, Chabalgoity JA. 2010. *Mucosal administration of flagellin protects mice from Streptococcus pneumoniae lung infection.* Infect Immun, **78**(10): p. 4226-33.
3. Marques, J.M., Rial A, Muñoz N, Pellay FX, Van Maele L, Léger H, Camou T, Sirard JC, Benecke A, Chabalgoity JA. 2012. *Protection against Streptococcus pneumoniae serotype 1 acute infection shows a signature of Th17- and IFN-gamma-mediated immunity.* Immunobiology, **217**(4): p. 420-9.
4. Saitou N. and Nei M. (1987). The neighbor-joining method: A new method for reconstructing phylogenetic trees. Molecular Biology and Evolution 4:406-425
5. Felsenstein J. (1985). Confidence limits on phylogenies: An approach using the bootstrap. Evolution 39:783-791.
6. Tamura K., Nei M., and Kumar S. (2004). Prospects for inferring very large phylogenies by using the neighbor-joining method. Proceedings of the National Academy of Sciences (USA) 101:11030-11035.

7. Kumar S., Stecher G., and Tamura K. (2016). MEGA7: Molecular Evolutionary Genetics Analysis version 7.0 for bigger datasets. *Molecular Biology and Evolution* 33:1870-1874.
8. Hasegawa M., Kishino H., and Yano T. (1985). Dating the human-ape split by a molecular clock of mitochondrial DNA. *Journal of Molecular Evolution* 22:160-174
